# Supplementary material for: Longitudinal monitoring in Cambodia suggests higher circulation of alpha and betacoronaviruses in juvenile and immature bats of three species
Source: PubMed Central journal article supplement (PMC8683416; doi:10.1038/s41598-021-03169-z), 2021-12-17

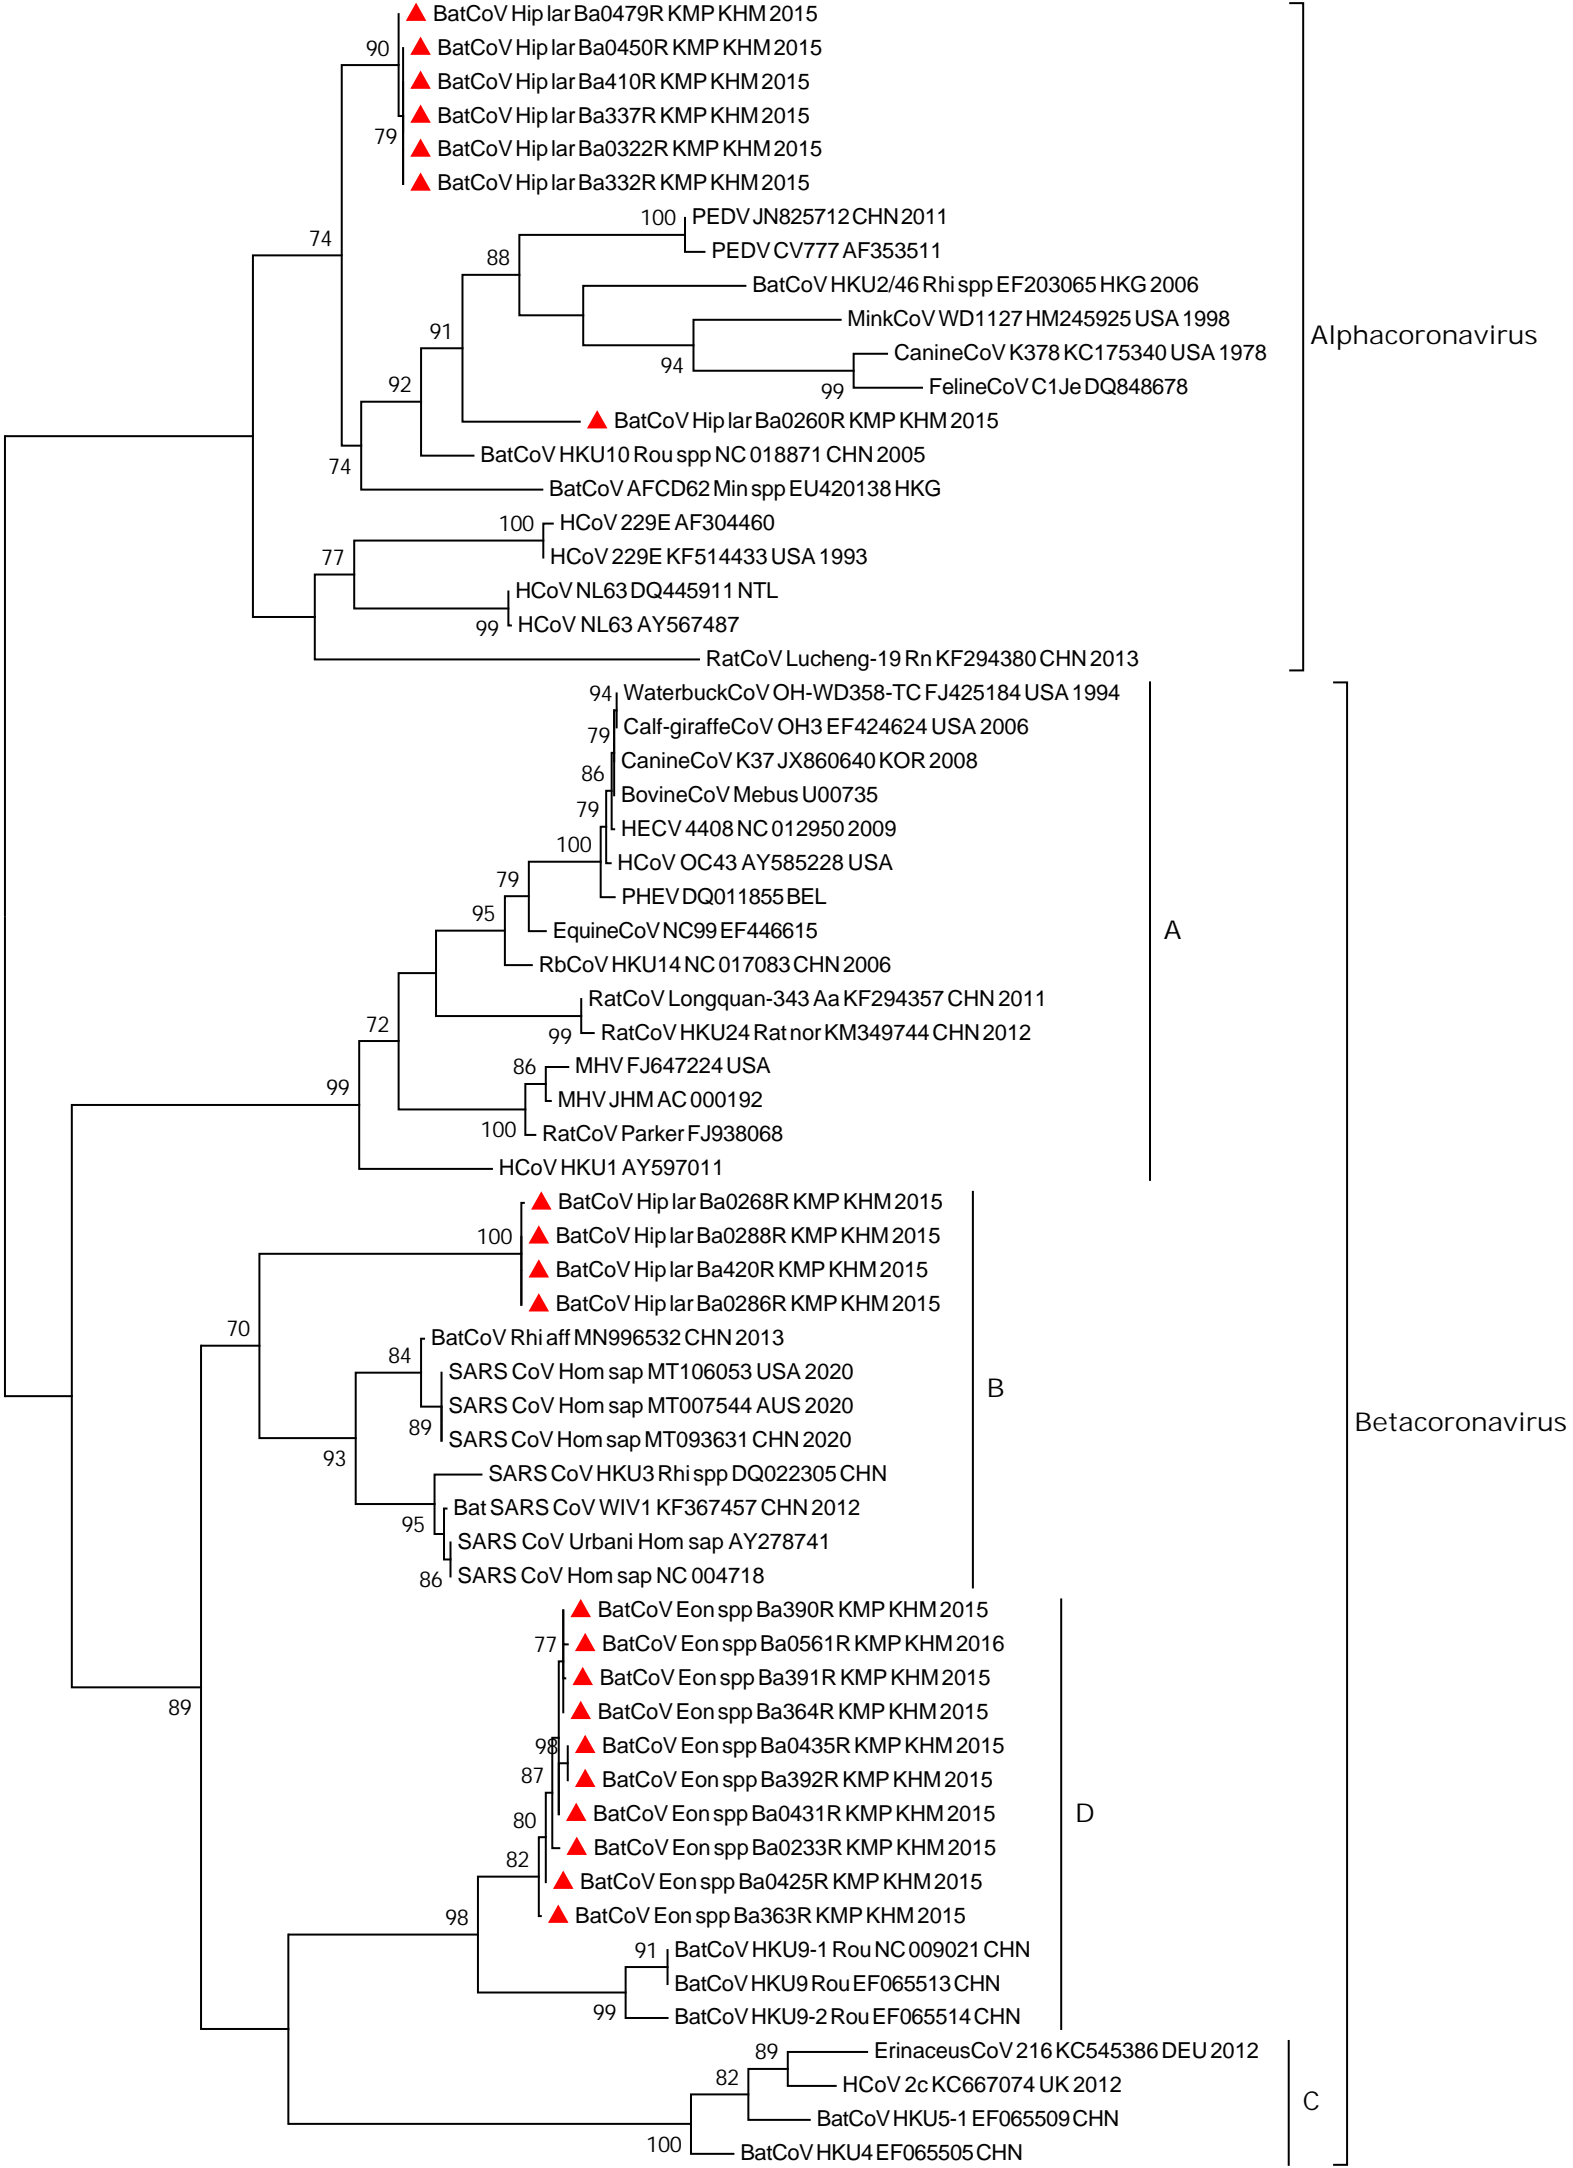

Supplement: 41598_2021_3169_MOESM1_ESM.pdf [file 41598_2021_3169_MOESM1_ESM.pdf]
